# Supplementary material
Source: Elsevier journal article supplement (https://www.sciencedirect.com/science/article/pii/S1885585719302853)
Supplement: mmc1 [file mmc1.pdf]

## MATERIAL ADICIONAL

**Tabla 1**

Fármacos recibidos y motivos de no recibir o no alcanzar las dosis recomendadas de distintos fármacos

|                                  | n     | %    |
|----------------------------------|-------|------|
| <b>A. IECA (n = 2.650)</b>       |       |      |
| <b>Reciben IECA</b>              | 1.701 | 64,2 |
| <i>Tipo</i>                      |       |      |
| Captopril                        | 51    | 3,0  |
| Enalapril                        | 853   | 50,2 |
| Lisinopril                       | 41    | 2,4  |
| Perindopril                      | 12    | 0,71 |
| Ramipril                         | 733   | 43,1 |
| Otro                             | 11    | 0,65 |
| <b>Razón para no tomarlo</b>     |       |      |
| <i>Contraindicado</i>            | 104   | 11,0 |
| <i>No tolerado</i>               | 252   | 26,6 |
| <i>Otros</i>                     | 519   | 54,8 |
| <i>No disponible</i>             | 72    | 7,6  |
| <b>Razón de contraindicado</b>   |       |      |
| <i>Estenosis renal bilateral</i> | 2     | 1,9  |
| <i>Hiperpotasemia</i>            | 5     | 4,8  |
| <i>Disfunción renal grave</i>    | 50    | 48,1 |
| <i>Hipotensión sintomática</i>   | 8     | 7,7  |
| <i>Otro</i>                      | 39    | 37,5 |

|                                      |     |       |
|--------------------------------------|-----|-------|
| <b>Razón de no tolerado</b>          |     |       |
| <i>Angioedema</i>                    | 3   | 1,2   |
| <i>Tos</i>                           | 135 | 53,6  |
| <i>Hiperpotasemia</i>                | 5   | 2,0   |
| <i>Hipotensión sintomática</i>       | 67  | 26,6  |
| <i>Deterioro de la función renal</i> | 31  | 12,3  |
| <i>Otro</i>                          | 10  | 4,0   |
| <i>No disponible</i>                 | 1   | 0,4   |
| <b>Dosis</b>                         |     |       |
| <i>Alcanza dosis objetivo</i>        | 479 | 28,2  |
| <i>Razón de no alcanzarla</i>        |     |       |
| Angioedema                           | 1   | 0,1   |
| Tos                                  | 4   | 0,33  |
| Hiperpotasemia                       | 45  | 3,7   |
| Titulación no finalizada             | 383 | 31,7  |
| Hipotensión sintomática              | 409 | 33,9  |
| Deterioro de la función renal        | 84  | 7,0   |
| Otro                                 | 217 | 18,0  |
| No disponible                        | 64  | 5,3   |
| <b>B. ARA-II (n = 2.649)</b>         |     |       |
| <b>Reciben ARA-II</b>                | 745 | 28,12 |
| <i>Tipo</i>                          |     |       |
| Candesartán                          | 261 | 35    |
| Losartán                             | 236 | 31,7  |
| Valsartán                            | 157 | 21,1  |
| Otro                                 | 91  | 12,2  |

|                                  |       |      |
|----------------------------------|-------|------|
| <b>Razón para no tomarlo</b>     |       |      |
| <i>Contraindicado</i>            | 223   | 11,8 |
| <i>No tolerado</i>               | 119   | 6,3  |
| <i>Otros</i>                     | 1.387 | 73,1 |
| <i>No disponible</i>             | 169   | 8,9  |
| <b>Razón de contraindicado</b>   |       |      |
| <i>Estenosis renal bilateral</i> | 1     | 0,45 |
| <i>Hiperpotasemia</i>            | 18    | 8,1  |
| <i>Disfunción renal grave</i>    | 55    | 24,7 |
| <i>Hipotensión sintomática</i>   | 17    | 7,6  |
| <i>Otro</i>                      | 131   | 58,7 |
| <i>No disponible</i>             | 1     | 0,45 |
| <b>Razón de no tolerado</b>      |       |      |
| <i>Hiperpotasemia</i>            | 1     | 0,84 |
| <i>Hipotensión sintomática</i>   | 93    | 78,2 |
| <i>Deterioro función renal</i>   | 21    | 17,7 |
| <i>Otro</i>                      | 4     | 3,4  |
| <b>Dosis</b>                     |       |      |
| <i>Alcanza dosis objetivo</i>    | 154   | 20,7 |
| <i>Razón de no alcanzarla</i>    |       |      |
| Angioedema                       | 2     | 0,4  |
| Hiperpotasemia                   | 14    | 2,8  |
| Titulación no finalizada         | 140   | 27,9 |
| Hipotensión sintomática          | 166   | 33,1 |

|                                      |       |      |
|--------------------------------------|-------|------|
| Deterioro función renal              | 47    | 9,4  |
| Otro                                 | 104   | 20,8 |
| No disponible                        | 28    | 5,6  |
| <b>C. ARM (n = 2.650)</b>            |       |      |
| <b>Reciben ARM</b>                   | 1.947 | 73,5 |
| <i>Tipo</i>                          |       |      |
| Canrenona                            | 1     | 0,05 |
| Eplerenona                           | 1.014 | 52,1 |
| Espironolactona                      | 929   | 47,7 |
| Otro                                 | 3     | 0,15 |
| <b>Razón para no tomarlo</b>         |       |      |
| <i>Contraindicado</i>                | 142   | 20,2 |
| <i>No tolerado</i>                   | 78    | 11,1 |
| <i>Otros</i>                         | 443   | 63,1 |
| <i>No disponible</i>                 | 39    | 5,6  |
| <b>Razón de contraindicado</b>       |       |      |
| <i>Hiperpotasemia</i>                | 41    | 28,9 |
| <i>Disfunción renal grave</i>        | 92    | 64,8 |
| <i>Otro</i>                          | 9     | 6,3  |
| <b>Razón de no tolerado</b>          |       |      |
| <i>Ginecomastia</i>                  | 2     | 2,6  |
| <i>Hiperpotasemia</i>                | 26    | 33,3 |
| <i>Deterioro de la función renal</i> | 31    | 39,7 |
| <i>Otro</i>                          | 19    | 24,4 |
| <b>Dosis</b>                         |       |      |
| <i>Alcanza dosis objetivo</i>        | 464   | 23,8 |
| <i>Razón de no alcanzarla</i>        |       |      |

|                                         |       |      |
|-----------------------------------------|-------|------|
| Ginecomastia                            | 9     | 0,6  |
| Hiperpotasemia                          | 162   | 11   |
| Titulación no finalizada                | 402   | 27,2 |
| Deterioro de la función renal           | 200   | 13,5 |
| Otro                                    | 570   | 38,6 |
| No disponible                           | 134   | 9,1  |
| <b>D. Bloqueadores beta (n = 2.650)</b> |       |      |
| <b>Reciben bloqueadores beta</b>        | 2.492 | 94   |
| <i>Tipo</i>                             |       |      |
| Bisoprolol                              | 1.022 | 41   |
| Carvedilol                              | 1.291 | 51,8 |
| Metoprolol                              | 23    | 0,9  |
| Nebivolol                               | 143   | 5,7  |
| Otro                                    | 13    | 0,5  |
| <b>Razón para no tomarlo</b>            |       |      |
| <i>Contraindicado</i>                   | 18    | 11,4 |
| <i>No tolerado</i>                      | 88    | 55,7 |
| <i>Otros</i>                            | 39    | 24,7 |
| <i>No disponible</i>                    | 13    | 8,2  |
| <b>Razón de contraindicado</b>          |       |      |
| <i>Asma</i>                             | 5     | 27,8 |
| <i>Bradiarritmia</i>                    | 3     | 16,7 |
| <i>PAD</i>                              | 2     | 11,1 |
| <i>Hipotensión sintomática</i>          | 1     | 5,6  |
| <i>Otro</i>                             | 7     | 38,9 |

|                                                       |     |      |
|-------------------------------------------------------|-----|------|
| <b>Razón de no tolerado</b>                           |     |      |
| <i>Bradiarritmia</i>                                  | 13  | 14,8 |
| <i>Broncospasmo</i>                                   | 17  | 19,3 |
| <i>Disfunción sexual</i>                              | 2   | 2,3  |
| <i>Hipotensión sintomática</i>                        | 30  | 34,1 |
| <i>Deterioro de la insuficiencia cardiaca</i>         | 10  | 11,4 |
| <i>Deterioro de la enfermedad arterial periférica</i> | 2   | 2,3  |
| <i>Otro</i>                                           | 13  | 14,8 |
| <i>No disponible</i>                                  | 1   | 1,1  |
| <b>Dosis</b>                                          |     |      |
| <i>Alcanza dosis objetivo</i>                         | 785 | 31,5 |
| <i>Razón de no alcanzarla</i>                         |     |      |
| Bradiarritmia                                         | 183 | 10,8 |
| Broncospasmo                                          | 62  | 3,7  |
| Disfunción sexual                                     | 7   | 0,4  |
| Titulación no finalizada                              | 611 | 36,1 |
| Hipotensión sintomática                               | 344 | 20,3 |
| Deterioro de la insuficiencia cardiaca                | 56  | 3,3  |
| Deterioro de la enfermedad arterial periférica        | 27  | 1,6  |
| Otro                                                  | 324 | 19,1 |
| No disponible                                         | 79  | 4,7  |

ARA-II: antagonistas del receptor de la angiotensina II; ARM: antagonistas del receptor de mineralocorticoides; IECA: inhibidores de la enzima de conversión de la angiotensina.

**Tabla 2**

Comparación de las características de los pacientes con y sin medición basal de potasio

|                                              | Sin información basal | Con información basal | p     |
|----------------------------------------------|-----------------------|-----------------------|-------|
| <b>Pacientes, n</b>                          | 291                   | 2.402                 |       |
| <b>Edad (años)</b>                           | 63,9 ± 11,8           | 63,6 ± 12,1           | 0,948 |
| <b>Grupo de edad, %</b>                      |                       |                       | 0,636 |
| <i>&lt; 60 años</i>                          | 33,2                  | 35,5                  |       |
| <i>60-69 años</i>                            | 34,3                  | 30,8                  |       |
| <i>70-79 años</i>                            | 24,1                  | 25,8                  |       |
| <i>≥ 80 años</i>                             | 8,4                   | 8                     |       |
| <b>Varones, %</b>                            | 79,7                  | 77,3                  | 0,366 |
| <b>Hábito tabáquico, %</b>                   |                       |                       | 0,012 |
| <i>Fumador actual</i>                        | 13,5                  | 10                    |       |
| <i>Exfumador</i>                             | 44,5                  | 53,3                  |       |
| <i>No fumador</i>                            | 42,1                  | 36,7                  |       |
| <b>Antecedentes personales, %</b>            |                       |                       |       |
| <i>Fibrilación auricular</i>                 | 29                    | 32                    | 0,766 |
| <i>Diabetes mellitus</i>                     | 29,3                  | 28,1                  | 0,008 |
| <i>Angina</i>                                | 39,2                  | 39                    | 0,945 |
| <i>Revascularización quirúrgica</i>          | 11,3                  | 9,6                   | 0,353 |
| <i>Revascularización percutánea</i>          | 27,2                  | 28,4                  | 0,661 |
| <i>Ictus/accidente isquémico transitorio</i> | 10,3                  | 8,1                   | 0,203 |



|                                                           |                          |                            |       |
|-----------------------------------------------------------|--------------------------|----------------------------|-------|
| <i>Enfermedad vascular periférica</i>                     | 9,6                      | 11,2                       | 0,424 |
| <i>Cirugía valvular</i>                                   | 7,9                      | 9,1                        | 0,508 |
| <i>Hipertensión arterial</i>                              | 48,1                     | 55,3                       | 0,020 |
| <i>Tromboembolia venosa</i>                               | 0                        | 1,4                        | 0,041 |
| <i>Enfermedad pulmonar obstructiva crónica</i>            | 12                       | 15,5                       | 0,119 |
| <i>Enfermedad renal</i>                                   | 11                       | 17,5                       | 0,005 |
| <i>Cáncer</i>                                             | 4,5                      | 6,4                        | 0,194 |
| <i>Hepatopatía</i>                                        | 1,7                      | 2,7                        | 0,339 |
| <i>Depresión</i>                                          | 5,9                      | 9,5                        | 0,042 |
| <i>Parkinson</i>                                          | 0                        | 0,4                        | 0,295 |
| <i>Artritis</i>                                           | 1,7                      | 1,3                        | 0,505 |
| <b>Filtrado glomerular estimado (MDRD)</b>                | 75,3 ± 27,7<br>(n = 107) | 70,8 ± 31,9<br>(n = 2.389) | 0,150 |
| <i>Categorías, %</i>                                      |                          |                            | 0,361 |
| Grave (< 30 ml/min/1,73 m <sup>2</sup> )                  | 2,8                      | 5,2                        |       |
| Moderado (30-59 ml/min/1,73 m <sup>2</sup> )              | 30,8                     | 30                         |       |
| Normal (≥ 60 ml/min/1,73 m <sup>2</sup> )                 | 66,4                     | 63,8                       |       |
| <b>Etiología de la IC, %</b>                              |                          |                            | 0,075 |
| <i>Miocardiopatía dilatada</i>                            | 39,3                     | 37,7                       |       |
| <i>Síndrome de IC con fracción de eyección conservada</i> | 0                        | 0                          |       |
| <i>Hipertensión</i>                                       | 5,5                      | 2,9                        |       |
| <i>Cardiopatía isquémica (no documentada)</i>             | 3,5                      | 2,5                        |       |
| <i>Cardiopatía isquémica (documentada)</i>                | 40                       | 41,1                       |       |

|                                       |     |     |  |
|---------------------------------------|-----|-----|--|
| <i>Miocardiopatía por taquicardia</i> | 0,7 | 1,3 |  |
| <i>Enfermedad valvular</i>            | 6,2 | 5,5 |  |
| <i>Otra</i>                           | 4,8 | 8   |  |

IC: insuficiencia cardiaca; MDRD: *Modification of Diet in Renal Disease*.
